# Supplementary material for: Genetic and Pharmacologic Inhibition of eIF4E Reduces Breast Cancer Cell Migration, Invasion, and Metastasis
Source: Oxford University Press journal article supplement (doi:10.1158/0008-5472.can-14-1996), 2015-01-22
Supplement: 00085472can141996-sup-134260_1_supp_2782850_ngh6jt.docx [file 00085472can141996-sup-134260_1_supp_2782850_ngh6jt.docx]

| **Supplemental Table S1. Ribavirin concentrations measured in mouse plasma.**  Blood was drawn 1-2 hours post ribavirin administration (3 mg/mouse *p.o.*). |
| --- |

| **Sample** | **Ribavirin conc. (nmol/L)** |
| --- | --- |
| FVB (non-tumor bearing)  **Control #2878** | < LLOQ* |
| FVB (non-tumor bearing)  **Ribavirin #2879** | 41,003 |
| FVB (non-tumor bearing)  **Ribavirin #2881** | 23,474 |
| FVB (non-tumor bearing)  **Ribavirin #2887** | 39,837 |
| Balb/c day 13 post injection of 66cl4 cells  **Control (pool of 5 mice)** | < LLOQ |
| Balb/c day 13 post injection of 66cl4 cells  **Ribavirin (pool of 5 mice)** | 24,854** |
| Balb/c day 27 post injection of 66cl4 cells  **Control #10809** | < LLOQ |
| Balb/c day 27 post injection of 66cl4 cells  **Ribavirin #10808** | 30,181 |
| Balb/c day 27 post injection of 66cl4 cells  **Ribavirin #10807** | 19,489 |
| Balb/c day 27 post injection of 66cl4 cells  **Ribavirin #10805** | 20,269 |

*Lower limit of quantification = 137 nmol/L

**Sample caused ion suppression of internal standard and may not be accurate
